# Supplementary material for: Synthesis of chiral high-entropy sulfides for non-linear optical applications
Source: Royal Society of Chemistry journal article supplement (doi:10.1039/d3qi01214j), 2023-01-01
Supplement: d3qi01214j1.pdf [file d3qi01214j1.pdf]

## Supplemental Information File

### Synthesis of Chiral High-Entropy Sulfides for the Non-Linear Optical

#### Applications

Nethmi W. Hewage<sup>1,2</sup>, Gayatri Viswanathan<sup>1,2</sup>, Philip Yox<sup>1,2</sup>, Kui Wu<sup>3</sup>, Kirill Kovnir<sup>1,2,\*</sup>, Georgiy Akopov<sup>1,2,4,\*</sup>

<sup>1</sup> *Department of Chemistry, Iowa State University, Ames, IA 50011, United States.*

<sup>2</sup> *Ames National Laboratory, U.S. Department of Energy, Ames, IA 50011, United States.*

<sup>3</sup> *State Key Laboratory of Crystal Materials and Institute of Crystal Materials, Shandong University, Jinan, 071002 China.*

<sup>4</sup> *Department of Chemistry, Rutgers University - Newark, Newark, NJ 07102, United States.*

\*Corresponding authors: [kovnir@iastate.edu](mailto:kovnir@iastate.edu), [georgiy.akopov@rutgers.edu](mailto:georgiy.akopov@rutgers.edu)

## Experimental Methods

### Synthesis

*Materials used:* S powder (99.5%, Alfa Aesar, USA); Cu, Mn, Y, La, Ce, Sm, and Gd as well as Ge pieces were acquired from the Materials Preparation Center at Ames Laboratory, which is supported by the US DOE Basic Energy Sciences: Cu pellets (99.995%), Mn pieces (99.99%), Y chunk (99.9999%), La chunk (99.9999%), Ce chunk 99.9999%), Sm chunk (99.9999%), Gd chunk (99.9999%), and Ge lumps (99.999%).

*Precursors:* Precursors with overall composition  $(A)_6(TM)Ge_2S_{14}$  ( $A = La, Sm, Gd, HEA = YLaCeSmGd, TM = Mn, Cu$ ) were prepared using pieces of appropriate metals and germanium. Samples with a total mass of 0.6 – 1.0 g were weighed out in a ratio of  $RE:Mn:Ge = 6:1:2.1$ ,  $RE:Cu:Ge = 6:2:2.1$ ,  $RE:Mn:Cu:Ge = 6:0.5:1:2.1$  and arc-melted. Details of the arc-melting procedure can be found elsewhere.<sup>1</sup>

*Bulk powders* of the materials were synthesized using the appropriate arc-melted precursor and sulfur powder. Samples were prepared by loading the finely ground precursor and sulfur (1:14 molar ratio) in a fused silica ampoule, which was then flame sealed under vacuum. The samples were heated over 12 hours to 1050°C, dwelled for 72-120 hours, and then cooled to room temperature over 8 hours. Samples with high-entropy compositions were ground in an agate mortar and re-annealed one more time using the same synthesis profile to achieve homogeneity.

*Single crystals* were grown using the pre-arc-melted precursor, S powder, and potassium iodide (KI) salt flux. The ratio of (precursor + S) to KI flux was kept at 1 to 30 by mass (*e.g.* for 0.1g of reactants, 3g of KI was used). The reactants and KI salt were added to a silica ampule, which was then sealed under vacuum. The samples were heated over 12 hours to 1050°C, dwelled for 72-120

hours, and then cooled to room temperature over 8 hours. The reaction products were washed with deionized water to remove the KI flux, and the sample was then vacuum filtered and allowed to dry.

### **X-ray Diffraction**

*Powder X-ray diffraction* (PXRD) was performed using a Rigaku Miniflex 600 with Cu- $K_{\alpha}$  radiation and a Ni- $K_{\beta}$  filter. Sample holders were composed of zero-background silicon plates. A thin layer of grease was applied to the surface and sample powders were sprinkled on top.

*Single crystal X-ray diffraction* (SCXRD) was performed using a Bruker D8 Venture diffractometer using Mo- $K_{\alpha}$  radiation. The crystal datasets were collected at 100 K or 173 K under a stream of dry N<sub>2</sub>. All datasets had  $\omega$ -scans recorded at a 0.3 - 0.6° step width and were integrated with the Bruker SAINT software package. Structure determination and refinement of the crystal structures were carried out using the SHELX suite of programs.<sup>2</sup> Transition metal site occupancies were refined. For Mn-Cu structures the occupancies of Mn and Cu were refined independently. The rare-earth metal site occupancies for *HEA* compositions were set at 20% per lanthanide and not further refined with constraints of atomic coordinates and atomic displacement parameters set to be equal for all lanthanides.

### **Scanning Electron Microscopy/Energy Dispersive Spectroscopy (SEM/EDS)**

Elemental analysis of samples was conducted using a FEI Quanta 250 field emission-SEM with EDS detector (Oxford X-Max 80, ThermoFischer Scientific, Inc., USA) and analyzed using the Aztec software. Powder samples were mounted in epoxy, polished to a level surface, and coated with a conductive layer of carbon. An accelerating voltage of 15kV was used to study all samples.

### **Solid-State Diffuse Reflectance Spectroscopy**

The UV/Vis diffuse reflectance spectra were measured from 200-1080 nm with a BLACK-Comet C-SR-100 spectrometer. Powder samples were finely ground and flattened on a microscope slide. Band gaps were estimated through extrapolation of the linear slope in the corresponding Tauc plots by plotting  $(Ah\nu)^{1/r}$  vs  $h\nu$  where  $r = 1/2$  for direct and  $r = 2$  for indirect band gaps.

### **Second Harmonic Generation (SHG) and Laser Damage Threshold (LDT)**

Through the Kurtz and Perry method, powder SHG responses were investigated by a *Q*-switch laser (2.09  $\mu\text{m}$ , 3 Hz, 50 ns) with different particle sizes, including 38-55, 55-88, 88-105, 105-150, 150-200, and 200-250  $\mu\text{m}$ . The AgGaS<sub>2</sub> single crystal was ground and sieved into the same size range as the reference. The LDTs were evaluated on powder sample (38-55  $\mu\text{m}$ ) with a pulsed YAG laser. A similar particle size of AgGaS<sub>2</sub> was chosen as the reference. To adjust different laser beams, an optical concave lens is added into the laser path. The damage spot is measured by the scale of an optical microscope.

**Table S1A.** SCXRD data collection and refinement parameters for  $(A)_6(TM)Ge_2S_{14}$  compositions ( $A = \text{La, Sm, Gd}$ ,  $HEA = \text{YLaCeSmGd}$ ,  $TM = \text{Mn, Cu}$ ).

| Phase                                | $\text{La}_6\text{MnGe}_2\text{S}_{14}$ | $\text{Sm}_6\text{MnGe}_2\text{S}_{14}$ | $\text{Gd}_6\text{MnGe}_2\text{S}_{14}$ | $(HEA)_{1.2}\text{MnGe}_2\text{S}_{14}$ | $(HEA)_6\text{Cu}_2\text{Ge}_2\text{S}_{14}$ |
|--------------------------------------|-----------------------------------------|-----------------------------------------|-----------------------------------------|-----------------------------------------|----------------------------------------------|
| CSD-number                           | 2266452                                 | 2266458                                 | 2266460                                 | 2266455                                 | 2266456                                      |
| Space group                          | $P6_3$                                  |                                         |                                         |                                         |                                              |
| $\lambda$ (Å)                        | Mo- $K_\alpha$ : 0.71073                |                                         |                                         |                                         |                                              |
| $T$ (K)                              | 100(2)                                  | 100(2)                                  | 100(2)                                  | 100(2)                                  | 100(2)                                       |
| $a$ (Å)                              | 10.3659(4)                              | 10.0192(5)                              | 9.9310(4)                               | 10.1513(4)                              | 10.1311(4)                                   |
| $c$ (Å)                              | 5.8005(3)                               | 5.7239(4)                               | 5.7198(3)                               | 5.7674(3)                               | 5.8113(3)                                    |
| $V$ (Å <sup>3</sup> )                | 539.77(5)                               | 497.61(6)                               | 488.54(5)                               | 514.70(5)                               | 516.56(5)                                    |
| $Z$                                  | 1                                       |                                         |                                         |                                         |                                              |
| $\rho$ (g•cm <sup>-3</sup> )         | 4.555                                   | 5.176                                   | 5.413                                   | 4.697                                   | 4.904                                        |
| Absorption correction                | multi-scan                              |                                         |                                         |                                         |                                              |
| $\mu$ (mm <sup>-1</sup> )            | 16.217                                  | 22.433                                  | 25.183                                  | 20.365                                  | 21.653                                       |
| $\theta$ (°)                         | $2.27 < \theta < 33.13$                 | $2.34 < \theta < 33.17$                 | $2.37 < \theta < 33.28$                 | $2.32 < \theta < 33.39$                 | $4.02 < \theta < 33.25$                      |
| Data / param.                        | 1374 / 39                               | 1282 / 38                               | 1266 / 39                               | 1342 / 39                               | 1317 / 39                                    |
| $R_1$                                | 0.013                                   | 0.036                                   | 0.020                                   | 0.016                                   | 0.016                                        |
| $wR_2$                               | 0.025                                   | 0.050                                   | 0.032                                   | 0.029                                   | 0.026                                        |
| Goodness-of-fit                      | 1.05                                    | 0.96                                    | 1.05                                    | 1.06                                    | 1.06                                         |
| Flack Param.                         | 0.03(2)                                 | 0.05(3)                                 | 0.03(2)                                 | 0.06(2)                                 | 0.06(1)                                      |
| Diff. peak/hole (e•Å <sup>-3</sup> ) | 0.36 / -0.60                            | 1.91 / -2.14                            | 1.08 / -1.19                            | 0.94 / -0.85                            | 0.68 / -0.86                                 |

**Table S1B.** SCXRD data collection and refinement parameters for  $(A)_6(TM)Ge_2S_{14}$  compositions ( $A = La, Sm, Gd, HEA = YLaCeSmGd, TM = Mn, Cu$ ).

| Phase                                | $La_6Mn_{0.5}CuGe_2S_{14}$ | $Sm_6Mn_{0.5}CuGe_2S_{14}$ | $Gd_6Mn_{0.5}CuGe_2S_{14}$ | $(HEA)_{1.2}Mn_{0.5}CuGe_2S_{14}$ | $(HEA)_{1.2}Mn_{0.5}CuGe_2S_{14}$ |
|--------------------------------------|----------------------------|----------------------------|----------------------------|-----------------------------------|-----------------------------------|
| CSD-number                           | 2266451                    | 2266454                    | 2266459                    | 2266457                           | 2266453                           |
| Space group                          | $P6_3$                     |                            |                            |                                   |                                   |
| $\lambda$ (Å)                        | Mo- $K\alpha$ : 0.71073    |                            |                            |                                   |                                   |
| $T$ (K)                              | 100(2)                     | 173(2)                     | 173(2)                     | 100(2)                            | 173(2)                            |
| $a$ (Å)                              | 10.3374(4)                 | 10.0219(3)                 | 9.9448(4)                  | 10.1366(4)                        | 10.1882(3)                        |
| $c$ (Å)                              | 5.8457(3)                  | 5.7484(3)                  | 5.7333(3)                  | 5.7986(3)                         | 5.7979(3)                         |
| $V$ (Å <sup>3</sup> )                | 540.99(5)                  | 500.01(4)                  | 491.05(5)                  | 515.99(5)                         | 521.19(4)                         |
| $Z$                                  | 1                          |                            |                            |                                   |                                   |
| $\rho$ (g•cm <sup>-3</sup> )         | 4.712                      | 5.275                      | 5.491                      | 4.850                             | 4.728                             |
| Absorption correction                | multi-scan                 |                            |                            |                                   |                                   |
| $\mu$ (mm <sup>-1</sup> )            | 17.192                     | 23.100                     | 25.719                     | 21.300                            | 20.649                            |
| $\theta$ (°)                         | $3.94 < \theta < 33.08$    | $2.35 < \theta < 33.19$    | $2.37 < \theta < 33.13$    | $4.02 < \theta < 33.27$           | $2.31 < \theta < 33.44$           |
| Data / param.                        | 1367 / 43                  | 1283 / 43                  | 1262 / 43                  | 1317 / 43                         | 1362 / 43                         |
| $R_1$                                | 0.016                      | 0.018                      | 0.012                      | 0.017                             | 0.027                             |
| $wR_2$                               | 0.027                      | 0.029                      | 0.024                      | 0.027                             | 0.041                             |
| Goodness-of-fit                      | 1.05                       | 1.08                       | 1.07                       | 1.07                              | 1.04                              |
| Flack Param.                         | 0.04(2)                    | 0.04(2)                    | 0.03(1)                    | 0.05(1)                           | 0.10(2)                           |
| Diff. peak/hole (e•Å <sup>-3</sup> ) | 0.78 / -0.75               | 0.87 / -1.18               | 0.75 / -0.61               | 0.68 / -0.73                      | 1.30 / -1.23                      |

**Table S2A.** Crystallographic data for  $(A)_6\text{MnGe}_2\text{S}_{14}$  phases ( $A = \text{La, Sm, Gd, HEA} = \text{YLaCeSmGd}$ ) and selected bond lengths, angles, and volumes of the space filling octahedra.

| Parameter                                       | $\text{La}_6\text{MnGe}_2\text{S}_{14}$ | $\text{Sm}_6\text{MnGe}_2\text{S}_{14}$ | $\text{Gd}_6\text{MnGe}_2\text{S}_{14}$ | $(\text{HEA})_6\text{MnGe}_2\text{S}_{14}$ |
|-------------------------------------------------|-----------------------------------------|-----------------------------------------|-----------------------------------------|--------------------------------------------|
| $r(\text{Ln})_{\text{ionic}}^a$                 | 1.160                                   | 1.079                                   | 1.053                                   | 1.091 <sup>b</sup>                         |
| $a$ (Å)                                         | 10.3659(4)                              | 10.0192(5)                              | 9.9310(4)                               | 10.1513(4)                                 |
| $c$ (Å)                                         | 5.8005(3)                               | 5.7239(4)                               | 5.7198(3)                               | 5.7674(3)                                  |
| $V$ (Å <sup>3</sup> )                           | 539.78                                  | 497.61                                  | 488.54                                  | 514.70                                     |
| <b>[LnS<sub>8</sub>]</b>                        |                                         |                                         |                                         |                                            |
| $d(\text{Ln-S})$ (Å)                            | 2.883-3.139                             | 2.786-3.125                             | 2.759-2.315                             | 2.826-3.145                                |
| $d(\text{Ln-S})_{\text{mean}}$ (Å)              | 3.001                                   | 2.916                                   | 2.899                                   | 2.951                                      |
| $V$ (Å <sup>3</sup> )                           | 46.77                                   | 42.93                                   | 42.13                                   | 44.51                                      |
| <b>[GeS<sub>4</sub>]<sub>Td</sub></b>           |                                         |                                         |                                         |                                            |
| $d(\text{Ge1-S3})$ (Å)                          | 2.227                                   | 2.220                                   | 2.221                                   | 2.227                                      |
| $d(\text{Ge1-S1})$ (Å) <sup>c</sup>             | 2.175                                   | 2.171                                   | 2.168                                   | 2.174                                      |
| $d(\text{Ge-S})_{\text{mean}}$ (Å) <sup>d</sup> | 2.214                                   | 2.208                                   | 2.208                                   | 2.214                                      |
| $\Delta d(\text{Ge-S})$ (%) <sup>e</sup>        | 2.33                                    | 2.21                                    | 2.39                                    | 2.38                                       |
| $\angle \text{S3-Ge-S1}$ (°)                    | 112.706                                 | 113.535                                 | 113.848                                 | 113.226                                    |
| $\angle \text{S3-Ge-S3}$ (°)                    | 106.052                                 | 105.119                                 | 104.762                                 | 105.424                                    |
| $V_{\text{Td}}$ (Å <sup>3</sup> )               | 5.55                                    | 5.49                                    | 5.48                                    | 5.53                                       |
| <b>[MnS<sub>6</sub>]<sub>Oh</sub></b>           |                                         |                                         |                                         |                                            |
| $d(\text{Mn-S})$ (Å)                            | 2.668-2.680                             | 2.613-2.637                             | 2.603-2.628                             | 2.643-2.654                                |
| $d(\text{Mn-S})_{\text{mean}}$ (Å)              | 2.674                                   | 2.625                                   | 2.616                                   | 2.648                                      |
| $\Delta d(\text{Mn-S})$ (%) <sup>e</sup>        | 0.45                                    | 0.91                                    | 0.95                                    | 0.41                                       |
| $(\angle \text{S2-Mn1-S2})_{\text{axial}}$ (°)  | 179.582                                 | 179.204                                 | 179.161                                 | 179.623                                    |
| $(\angle \text{S2-Mn1-S2})_{\text{equat}}$ (°)  | 86.630                                  | 86.889                                  | 87.032                                  | 86.828                                     |
| $V_{\text{Oh}}$ (Å <sup>3</sup> )               | 25.35                                   | 24.01                                   | 23.76                                   | 24.64                                      |

<sup>a</sup> from Shannon [3];

<sup>b</sup> ionic radius for the HEA composition was calculated as the average of Y, La, Ce, Sm and Gd ionic radii;

<sup>c</sup> Ge-S bond along the [001] direction;

<sup>d</sup> mean interatomic distance;

<sup>e</sup> difference between actual and mean bond lengths.

**Table S2B.** Crystallographic data for  $(A)_6(TM)Ge_2S_{14}$  phases ( $A = La, Sm, Gd$ ,  $HEA = YLaCeSmGd$ ,  $TM = Mn, Cu$ ) and selected bond lengths, angles, and volumes of the space filling octahedra.

| Parameter                             | $La_6Mn_{0.5}CuGe_2S_{14}$ | $Sm_6Mn_{0.5}CuGe_2S_{14}$ | $Gd_6Mn_{0.5}CuGe_2S_{14}$ | $(HEA)_6Cu_2Ge_2S_{14}$ |
|---------------------------------------|----------------------------|----------------------------|----------------------------|-------------------------|
| $r(Ln)_{ionic}^a$                     | 1.160                      | 1.079                      | 1.053                      | 1.091 <sup>b</sup>      |
| $a$ (Å)                               | 10.3374(4)                 | 10.0119(3)                 | 9.9448(4)                  | 10.1311(4)              |
| $c$ (Å)                               | 5.8457(3)                  | 5.7462(2)                  | 5.7333(3)                  | 5.8113(3)               |
| $V$ (Å <sup>3</sup> )                 | 540.99                     | 498.82                     | 491.05                     | 516.56                  |
| <b>[LnS<sub>8</sub>]</b>              |                            |                            |                            |                         |
| $d(Ln-S)$ (Å)                         | 2.879-3.156                | 2.791-3.125                | 2.769-3.139                | 2.829-3.153             |
| $d(Ln-S)_{mean}$ (Å)                  | 3.004                      | 2.919                      | 2.903                      | 2.956                   |
| $V$ (Å <sup>3</sup> )                 | 46.97                      | 43.09                      | 42.38                      | 44.77                   |
| <b>[GeS<sub>4</sub>]<sub>Td</sub></b> |                            |                            |                            |                         |
| $d(Ge1-S3)$ (Å)                       | 2.226                      | 2.219                      | 2.223                      | 2.224                   |
| $d(Ge1-S1)$ (Å) <sup>c</sup>          | 2.179                      | 2.172                      | 2.171                      | 2.179                   |
| $d(Ge-S)_{mean}$ (Å) <sup>d</sup>     | 2.214                      | 2.207                      | 2.210                      | 2.213                   |
| $\Delta d(Ge-S)$ (%) <sup>e</sup>     | 2.11                       | 2.12                       | 2.34                       | 2.02                    |
| $\angle S3-Ge-S1$ (°)                 | 112.890                    | 113.707                    | 113.900                    | 113.496                 |
| $\angle S3-Ge-S3$ (°)                 | 105.846                    | 104.923                    | 104.701                    | 105.163                 |
| $V_{Td}$ (Å <sup>3</sup> )            | 5.54                       | 5.48                       | 5.50                       | 5.52                    |
| <b>[MnS<sub>6</sub>]<sub>Oh</sub></b> |                            |                            |                            |                         |
| $d(Mn-S)$ (Å)                         | 2.697 - 2.700              | 2.649 – 2.653              | 2.640 – 2.645              | -                       |
| $d(Mn-S)_{mean}$ (Å)                  | 2.698                      | 2.615                      | 2.642                      | -                       |
| $\Delta d(Mn-S)$ (%) <sup>e</sup>     | 0.11                       | 0.15                       | 0.19                       | -                       |
| $(\angle S2-Mn1-S2)_{axial}$ (°)      | 179.875                    | 179.875                    | 179.854                    | -                       |
| $(\angle S2-Mn1-S2)_{equat}$ (°)      | 86.559                     | 86.585                     | 86.636                     | -                       |
| $V_{Oh}$ (Å <sup>3</sup> )            | 26.05                      | 24.7                       | 24.47                      | -                       |
| <b>[CuS<sub>3</sub>]<sub>Δ</sub></b>  |                            |                            |                            |                         |
| $d(Cu-S)$ (Å)                         | 2.269                      | 2.229                      | 2.222                      | 2.265                   |
| $\alpha$ ( $\angle Cu1-Cu1-S2$ ) (°)  | 88.391                     | 92.038                     | 92.351                     | 92.309                  |
| $\beta$ ( $\angle S2-Cu1-S2$ ) (°)    | 119.922                    | 119.875                    | 119.833                    | 119.839                 |

<sup>a</sup> from Shannon [3];

<sup>b</sup> ionic radius for the *HEA* composition was calculated as the average of Y, La, Ce, Sm and Gd ionic radii;

<sup>c</sup> Ge-S bond along the [001] direction;

<sup>d</sup> mean interatomic distance;

<sup>e</sup> difference between actual and mean bond lengths.



**Table S2C.** Crystallographic data for  $(HEA)_6Mn_{0.5}CuGe_2S_{14}$  phases ( $HEA = YLaCeSmGd$ ) and select bond lengths, angles, and volumes of the space filling octahedra.

| Parameter                             | $(HEA)_6Mn_{0.5}CuGe_2S_{14}$ | $(HEA)_6Mn_{0.5}CuGe_2S_{14}$ |
|---------------------------------------|-------------------------------|-------------------------------|
| $r(Ln)_{ionic}^a$                     | 1.091 <sup>b</sup>            | 1.091 <sup>b</sup>            |
| $a$ (Å)                               | 10.1366(4)                    | 10.1882(3)                    |
| $c$ (Å)                               | 5.7986(3)                     | 5.7979(3)                     |
| $V$ (Å <sup>3</sup> )                 | 515.99                        | 521.19                        |
| <b>[LnS<sub>8</sub>]</b>              |                               |                               |
| $d(Ln-S)$ (Å)                         | 2.826-3.153                   | 2.839-3.150                   |
| $d(Ln-S)_{mean}$ (Å)                  | 2.954                         | 2.965                         |
| $V$ (Å <sup>3</sup> )                 | 44.68                         | 45.12                         |
| <b>[GeS<sub>4</sub>]<sub>Td</sub></b> |                               |                               |
| $d(Ge1-S3)$ (Å)                       | 2.226                         | 2.225                         |
| $d(Ge1-S1)$ (Å) <sup>c</sup>          | 2.178                         | 2.180                         |
| $d(Ge-S)_{mean}$ (Å) <sup>d</sup>     | 2.214                         | 2.214                         |
| $\Delta d(Ge-S)$ (%) <sup>e</sup>     | 2.16                          | 2.02                          |
| $\angle S3-Ge-S1$ (°)                 | 113.423                       | 113.218                       |
| $\angle S3-Ge-S3$ (°)                 | 105.247                       | 105.478                       |
| $V_{Td}$ (Å <sup>3</sup> )            | 5.53                          | 5.54                          |
| <b>[MnS<sub>6</sub>]<sub>Oh</sub></b> |                               |                               |
| $d(Mn-S)$ (Å)                         | 2.669 – 2.683                 | 2.667 – 2.672                 |
| $d(Mn-S)_{mean}$ (Å)                  | 2.676                         | 2.670                         |
| $\Delta d(Mn-S)$ (%) <sup>e</sup>     | 0.52                          | 0.19                          |
| $(\angle S2-Mn1-S2)_{axial}$ (°)      | 179.541                       | 179.833                       |
| $(\angle S2-Mn1-S2)_{equat}$ (°)      | 86.578                        | 86.688                        |
| $V_{Oh}$ (Å <sup>3</sup> )            | 25.40                         | 25.23                         |
| <b>[CuS<sub>3</sub>]<sub>Δ</sub></b>  |                               |                               |
| $d(Cu-S)$ (Å)                         | 2.250                         | 2.243                         |
| $\alpha$ ( $\angle Cu1-Cu1-S2$ ) (°)  | 92.112                        | 91.837                        |
| $\beta$ ( $\angle S2-Cu1-S2$ ) (°)    | 119.865                       | 119.898                       |

<sup>a</sup> from Shannon [3];

<sup>b</sup> ionic radius for the  $HEA$  composition was calculated as the average of Y, La, Ce, Sm and Gd ionic radii;

<sup>c</sup> Ge-S bond along the [001] direction;

<sup>d</sup> mean interatomic distance;

<sup>e</sup> difference between actual and mean bond lengths.

**Table S3.** Second harmonic generation (SHG) and laser damage threshold (LDT) data for the  $(A)_6(TM)Ge_2S_{14}$  compositions ( $A = La, Sm, Gd$ ,  $HEA = YLaCeSmGd$ ,  $TM = Mn, Cu$ ).

| Nominal Composition                                                              | SHG                       |       |        |         |         |         | LDT                      |                   |                     |
|----------------------------------------------------------------------------------|---------------------------|-------|--------|---------|---------|---------|--------------------------|-------------------|---------------------|
|                                                                                  | Particle Size ( $\mu m$ ) |       |        |         |         |         | Laser damage energy (mJ) | LDT ( $MW/cm^2$ ) | LDT ( $\times$ AGS) |
|                                                                                  | 38-55                     | 55-88 | 88-105 | 105-150 | 150-200 | 200-250 |                          |                   |                     |
| AgGaS <sub>2</sub> (AGS)                                                         | 22.4                      | 26.8  | 28.4   | 34.4    | 43.2    | 47.2    | 0.58                     | 29.6              | 1.0                 |
| La <sub>6</sub> MnGe <sub>2</sub> S <sub>14</sub>                                | 18.4                      | 24.8  | 25.6   | 33.6    | 38.4    | 48.0    | 1.47                     | 75.0              | 2.5                 |
| La <sub>6</sub> Mn <sub>0.5</sub> CuGe <sub>2</sub> S <sub>14</sub>              | 19.2                      | 24.0  | 31.2   | 32.8    | 35.2    | 40.8    | 1.17                     | 59.5              | 2.0                 |
| Sm <sub>6</sub> MnGe <sub>2</sub> S <sub>14</sub>                                | 28.8                      | 33.6  | 44.0   | 48.0    | 52.0    | 63.2    | 1.86                     | 95.0              | 3.2                 |
| Sm <sub>6</sub> Mn <sub>0.5</sub> CuGe <sub>2</sub> S <sub>14</sub> <sup>a</sup> | 32.0                      |       |        |         |         |         | 1.04                     | 53.0              | 1.8                 |
| Gd <sub>6</sub> MnGe <sub>2</sub> S <sub>14</sub> <sup>a</sup>                   | 40.8                      |       |        |         |         |         | 1.18                     | 60.0              | 2.0                 |
| Gd <sub>6</sub> Mn <sub>0.5</sub> CuGe <sub>2</sub> S <sub>14</sub>              | 24.0                      | 29.6  | 37.6   | 44.0    | 48.0    | 40.0    | 1.98                     | 101.0             | 3.4                 |
| (HEA) <sub>1.2</sub> Cu <sub>2</sub> Ge <sub>2</sub> S <sub>14</sub>             | 31.2                      | 35.2  | 39.2   | 43.2    | 44.8    | 63.2    | 1.63                     | 83.0              | 2.8                 |
| (HEA) <sub>1.2</sub> MnGe <sub>2</sub> S <sub>14</sub>                           | 28.8                      | 30.0  | 36.0   | 37.6    | 42.4    | 58.0    | 0.88                     | 45.0              | 1.5                 |
| (HEA) <sub>1.2</sub> Mn <sub>0.5</sub> CuGe <sub>2</sub> S <sub>14</sub>         | 19.2                      | 21.6  | 33.6   | 35.2    | 38.4    | 44.0    | 1.75                     | 89.2              | 3.0                 |

<sup>a</sup> not enough material was present to be analyzed at all the different particle sizes.

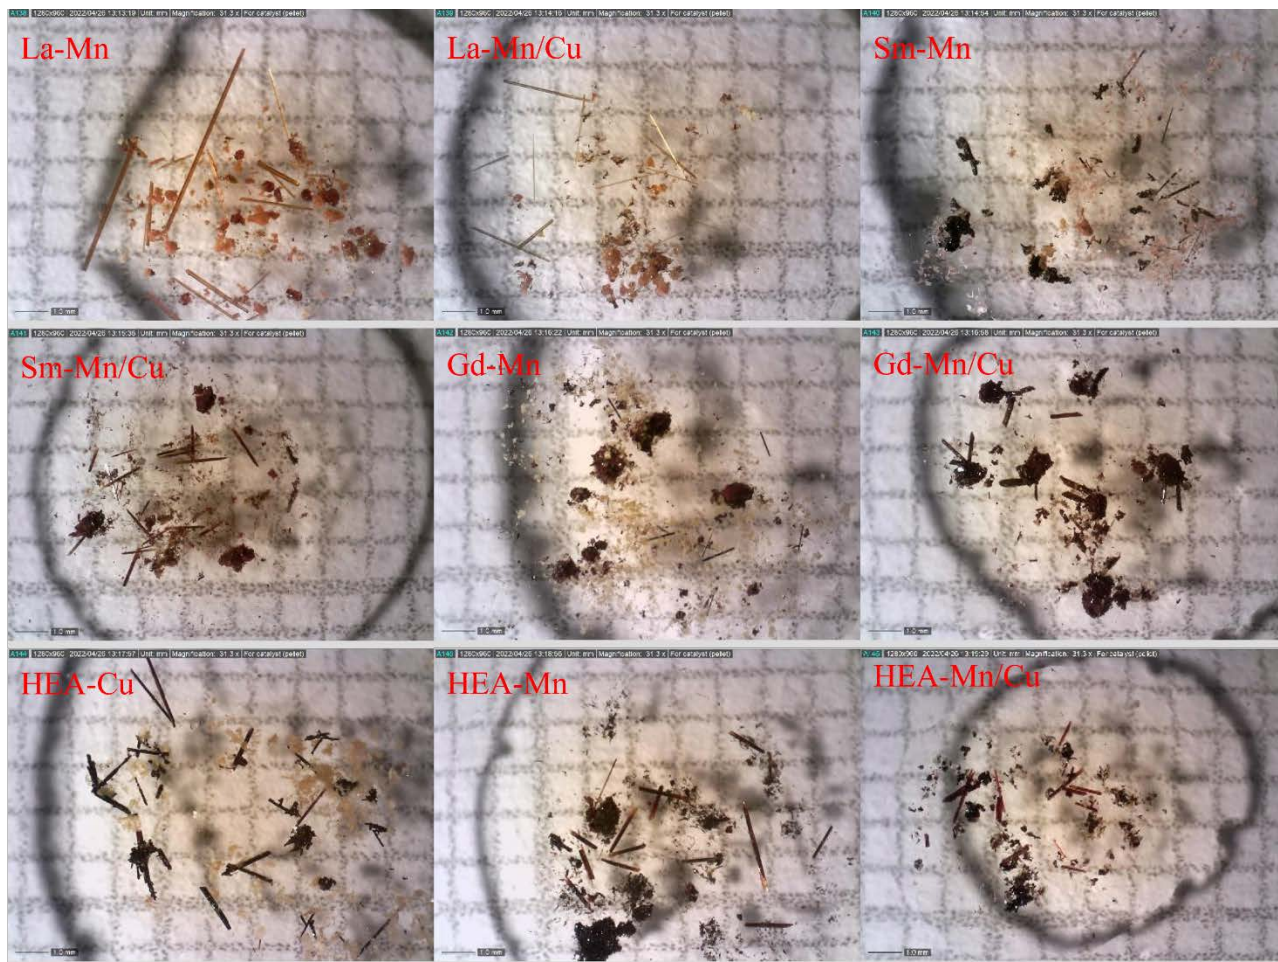

**Figure S1.** Optical images of the crystals of  $(Ln)_6(TM)_2Ge_2S_{14}$ , where  $Ln = La, Sm, Gd,$  and HEA ( $Y+La+Ce+Sm+Gd$ );  $TM = Mn$  or  $Mn_{0.5}Cu$ . Scale bar and grid size are 1 mm in all images.

## REFERENCES

- (1) Akopov, G.; Hewage, N. W.; Yox, P.; Viswanathan, G.; Lee, S. J.; Hulsebosch, L. P.; Cady, S. D.; Paterson, A. L.; Perras, F. A.; Xu, W.; Wu, K.; Mudryk, Y.; Kovnir, K. Synthesis-Enabled Exploration of Chiral and Polar Multivalent Quaternary Sulfides. *Chem. Sci.* **2021**, *12* (44), 14718–14730. <https://doi.org/10.1039/D1SC03685H>.
- (2) Sheldrick, G. M. A Short History of *SHELX*. *Acta Crystallogr A Found Crystallogr* **2008**, *64* (1), 112–122. <https://doi.org/10.1107/S0108767307043930>.
- (3) Shannon, R. D. Revised Effective Ionic Radii and Systematic Studies of Interatomic Distances in Halides and Chalcogenides. *Acta Cryst A* **1976**, *32* (5), 751–767. <https://doi.org/10.1107/S0567739476001551>.
